# Supplementary material
Source: publisher figshare collection journal article supplement (https://frontiersin.figshare.com/ndownloader/files/18790547)
Supplement: Supplementary file [file 18790547]

## **A Systematic Review of Childhood Diabetes Research in the Middle East Region**

Saras Saraswathi<sup>1#</sup>, Sara Al-Khawaga<sup>1, 3#</sup>, Naser Elkum<sup>2</sup> and Khalid Hussain<sup>1\*</sup>

<sup>1</sup>Department of Pediatrics, Division of Endocrinology, Sidra Medicine, Doha, Qatar

<sup>2</sup>Clinical Research Center, Biostatistics Sec, Research Services, Sidra Medicine, Doha, Qatar

<sup>3</sup> College of Health & Life Sciences, Hamad Bin Khalifa University, Qatar Foundation, Education City, Doha, Qatar

### **Appendix E – Quantitative Analysis of Collaborative studies.**

This table shows the number of collaborative research studies in the Middle East, with studies involving only one country (28 studies) to some that involve many countries, the highest being 7 countries in one of the studies (Figure 5 in the main manuscript). In total, there are 28 studies involving only one country, 8 studies with two countries in collaboration, 4 studies with 3 collaborating countries each, 2 studies with 4 collaborating countries and one study with 7 collaborating countries.

| #  | Country      | Number of collaborations | Author (year)                                  | Type of study   |
|----|--------------|--------------------------|------------------------------------------------|-----------------|
| 1  | Middle East  | 7                        | <a href="#">Habebe et. al. (2012)</a>          | Molecular study |
| 2  | Qatar        | 1                        | <a href="#">Alyafei F. et.al. (2018)</a>       | Clinical        |
| 3  | Iran         | 1                        | <a href="#">Aletayeb MA, et.al. 2018</a>       | Clinical        |
| 4  | Saudi Arabia | 1                        | <a href="#">Al-Ghamdi A.H. et. al. 2018</a>    | Clinical        |
| 5  | Saudi Arabia | 1                        | <a href="#">Al-Herbish, A.S., et al., 2008</a> | Clinical        |
| 6  | Kuwait       | 4                        | <a href="#">Shaltout, A.A., et al. 2018</a>    | Clinical        |
| 7  | Saudi Arabia | 2                        | <a href="#">Damanhour, L.H., et al., 2005</a>  | Clinical        |
| 8  | Qatar        | 2                        | <a href="#">Alyafei, F., et al. 2018</a>       | Clinical        |
| 9  | Saudi Arabia | 2                        | <a href="#">Al-Jenaidi, F.A., et al. 2005</a>  | Clinical        |
| 10 | Saudi Arabia | 1                        | <a href="#">Albishi, M.M.A., 2017</a>          | Clinical        |

|    |              |   |                                                         |                   |
|----|--------------|---|---------------------------------------------------------|-------------------|
| 11 | Saudi Arabia | 1 | <a href="#"><u>Al-Agha, A., A. 2012</u></a>             | Clinical          |
| 12 | UAE          | 1 | <a href="#"><u>Punnose, J., et al. 2002</u></a>         | Clinical          |
| 13 | UAE          | 1 | <a href="#"><u>Punnose, J. et. al. 2005</u></a>         | Clinical          |
| 14 | Kuwait       | 1 | <a href="#"><u>Moussa, M.A., et al. 2008</u></a>        | Clinical          |
| 15 | Egypt        | 1 | <a href="#"><u>Ali, B.A., et al. 2013</u></a>           | Clinical          |
| 16 | Saudi Arabia | 3 | <a href="#"><u>Habeb AM et. al. 2012</u></a>            | Molecular study   |
| 17 | UAE          | 3 | <a href="#"><u>Deeb, A., et al. 2016</u></a>            | Molecular study   |
| 18 | Iran         | 2 | <a href="#"><u>Abbasi, F., et al. 2018</u></a>          | Molecular study   |
| 19 | Oman         | 2 | <a href="#"><u>Al Senani, A., et al. 2018</u></a>       | Molecular study   |
| 20 | Saudi Arabia | 3 | <a href="#"><u>Elkholy, S. and A.A. Lardhi 2015</u></a> | Literature Search |
| 21 | UAE          | 1 | <a href="#"><u>Hussain, T., et al. 2017</u></a>         | Clinical          |

|    |              |   |                                                |                       |
|----|--------------|---|------------------------------------------------|-----------------------|
| 22 | UAE          | 1 | <a href="#">Asma, D., et al. 2015</a>          | Technology evaluation |
| 23 | Saudi Arabia | 1 | <a href="#">Al-Agha, A.E., et al. 2017</a>     | Technology evaluation |
| 24 | Saudi Arabia | 2 | <a href="#">Alamoudi, R., et al. 2014</a>      | Clinical              |
| 25 | Qatar        | 1 | <a href="#">Petrovski, G., et al. 2018</a>     | Technology evaluation |
| 26 | Qatar        | 1 | <a href="#">Petrovski, G., et al. 2018</a>     | Technology evaluation |
| 27 | Saudi Arabia | 4 | <a href="#">Cherian, M.P., et al. 2010</a>     | Clinical              |
| 28 | Saudi Arabia | 1 | <a href="#">Abduljabbar, M.A., et al. 2010</a> | Clinical              |
| 29 | Saudi Arabia | 1 | <a href="#">Habeib, A.M., et al. 2011</a>      | Clinical              |
| 30 | Saudi Arabia | 1 | <a href="#">Al-Rubeaan, K., 2015</a>           | Clinical              |
| 31 | Kuwait       | 1 | <a href="#">Moussa, M.A., et al. 2005</a>      | Clinical              |
| 32 | Qatar        | 2 | <a href="#">Alyafei, F., et al. 2018</a>       | Clinical              |

|    |              |   |                                                             |                 |
|----|--------------|---|-------------------------------------------------------------|-----------------|
| 33 | Turkey       | 1 | <a href="#"><u>Saruhan-Direskeneli, G., et al. 2000</u></a> | Molecular study |
| 34 | Bahrain      | 3 | <a href="#"><u>Al-Harbi, E.M., et al. 2004</u></a>          | Molecular study |
| 35 | Saudi Arabia | 1 | <a href="#"><u>Al-Hayek, A.A., et al. 2015</u></a>          | Clinical        |
| 36 | Kuwait       | 1 | <a href="#"><u>Shaltout, A.A., et al. 2016</u></a>          | Clinical        |
| 37 | Saudi Arabia | 1 | <a href="#"><u>Satti, S.A. et. al. 2013</u></a>             | Clinical        |
| 38 | Saudi Arabia | 1 | <a href="#"><u>Naeem, M.A., et al. 2015</u></a>             | Clinical        |
| 39 | Saudi Arabia | 1 | <a href="#"><u>Habib, H.S., 2005</u></a>                    | Clinical        |
| 40 | Kuwait       | 1 | <a href="#"><u>Abdul-Rasoul, M., et al. 2010</u></a>        | Clinical        |
| 41 | Saudi Arabia | 1 | <a href="#"><u>Kulaylat, N.A. et. al. 2001</u></a>          | Clinical        |
| 42 | Saudi Arabia | 1 | <a href="#"><u>Sayed, M.H., et al. 2017</u></a>             | Clinical        |
| 43 | Qatar        | 2 | <a href="#"><u>O'Beirne, S.L., et al. 2016</u></a>          | Molecular study |
